# Supplementary material for: G101 筋肉におけるエネルギ変換 : その熱力学的性質と工学的モデル(オーガナイズドセッション19 : 生体・医療・食品などに関わる複雑輸送現象とその実践的問題)
Source: Royal Society of Chemistry journal article supplement (doi:10.1039/d3cp04234k), 2001-11-03
Supplement: d3cp04234k1.pdf [file d3cp04234k1.pdf]

# White Light Emitting Single Halochromic Hydrazine Bridged *Bis(3-Pyrrolyl BODIPY) Fluorophore*

**Kanhu Charan Behera, Mangalampalli Ravikanth\***

Department of Chemistry, Indian Institute of Technology Bombay, Powai, Mumbai 400076,  
India. E-mail: [ravikanth@chem.iitb.ac.in](mailto:ravikanth@chem.iitb.ac.in)

## Supplementary information

| Sl. no | Details                                                                                                                                                                                             | Page no. |
|--------|-----------------------------------------------------------------------------------------------------------------------------------------------------------------------------------------------------|----------|
| 1.     | Experimental: Materials and methods                                                                                                                                                                 | S2-S3    |
| 2.     | Characterization data of compound <b>10</b> : HR-MS, <sup>1</sup> H, COSY, NOESY, <sup>13</sup> C, <sup>11</sup> B, <sup>19</sup> F NMR                                                             | S4-S7    |
| 3.     | X-ray crystal data of <b>10</b>                                                                                                                                                                     | S8-S10   |
| 4.     | <u>Photophysical investigations:</u><br>Photophysical data of <b>10</b> and <b>10.2H<sup>+</sup></b><br>Excited state life time data (TCSPC measurements) of <b>10</b> and <b>10.2H<sup>+</sup></b> | S11-S16  |
| 5.     | <sup>1</sup> H NMR titration of <b>10</b> in the presence of TFA                                                                                                                                    | S17      |
|        | DFT optimized structure and data of <b>10</b> and <b>10.2H<sup>+</sup></b><br>Comparison of theoretical and experimental UV/vis absorption spectra <b>10</b> and <b>10.2H<sup>+</sup></b>           | S18      |
| 6.     | Theoretical calculations of compounds <b>10</b> their protonation derivative <b>10.2H<sup>+</sup></b> and TD-DFT data                                                                               | S18-S24  |
| 7.     | References                                                                                                                                                                                          | S25      |

## MATERIALS AND METHODS

### Materials:

The chemicals, such as  $\text{BF}_3 \cdot \text{Et}_2\text{O}$  and 2,3-dichloro-5,6-dicyano-1,4-benzoquinone (DDQ), hydrazine hydrate, TFA, DMF, and  $\text{POCl}_3$ , were used as obtained from Aldrich and TCI. All other chemicals used for the synthesis were reagent grade unless otherwise specified. Column chromatography was performed on silica gel (100-200) and basic alumina.

### Methods:

- The  $^1\text{H}$  and  $^{13}\text{C}$  NMR spectra were recorded in  $\text{CDCl}_3$  on Bruker 400 and 500 MHz instruments. The frequencies for the  $^{13}\text{C}$  nucleus are 100.06 and 125.77 MHz for 400 and 500 MHz instruments, respectively.
- Absorption and steady state fluorescence spectra were obtained with PerkinElmer Lambda-35.
- Cyclic voltammetry (CV) studies were carried out with the BAS electrochemical system utilizing the three-electrode configuration consisting of glassy carbon (working electrode), platinum wire (auxiliary electrode), and saturated calomel (reference electrode) electrodes. The experiments were done in dry dichloromethane using tetrabutylammonium perchlorate as a supporting electrolyte.
- Mass spectra were recorded with a Q-TOF micro mass spectrometer.
- Fluorescence quantum yields were determined<sup>S1</sup> in each case by comparing the corrected spectrum with that of Rhodamine 6G ( $\Phi = 0.95$ )<sup>S2</sup> in EtOH by taking the area under total emission using the procedure reported earlier.
- The exponential decay curve of **10** and **10.2H<sup>+</sup>** were fitted appropriately with a mono/bi-exponential equation  $Y = A + B_1 \exp(-t/\tau_1) + B_2 \exp(-t/\tau_2)$  to obtain best

goodness-of-fit  $\chi^2$  value. The average life time ( $\tau_{av}$ ) was calculated following the equations depicted in literature<sup>S3</sup>.

- Rigaku Saturn 724 diffractometer was used for performing Single-crystal X-ray structure analysis which comprised of a low-temperature attachment. Data were collected at 100 K using graphite-monochromated MoK $_{\alpha}$  radiation ( $\lambda_{\alpha}$ =0.71073 Å) by the  $\omega$ -scan technique. Data were reduced by using Crystal Clear-SM Expert 2.1 b24 software. Structures were solved by direct methods and refined by least-squares against F2 utilizing the software packages SHELXL-97, SIR-92 and WINGX. All non-hydrogen atoms were refined anisotropically. X-ray data for the compound **10** was collected on a Bruker Kappa CCD diffractometer equipped with a graphite monochromated MoK $_{\alpha}$  radiation source at 200 K using the  $\theta$ -2 $\theta$  scan mode.
- Quantum chemical calculations (gas phase / vacuum) for ground state energy minimized structures for the probes **10** and **10.2H<sup>+</sup>** were done employing density functional theory (DFT) in a Gaussian 09W program package<sup>S4</sup>. The ground state structural elucidation involved in optimization using DFT based Beck-3 Lee Young Parr (B3LYP) functional where 6-311G basis sets were used. To obtain the oscillator strengths, identical basis and functional hybrid set were used whereas the vertical excitation energies were obtained by the help of TD-DFT techniques. Under the Polarizable Continuum Model (PCM) in the toluene media all the computations were done using the Self-Consistent Reaction Field (SCRF). The electronic absorption spectra as well as the oscillator strengths were thoroughly examined using TD-DFT with PCM model on the basis of the optimized structures in the S<sub>0</sub> state. <sup>S5</sup>

Compound Details

Cpd. 1: C42 H32 B2 F4 N8

| Formula          | m/z      | Observed M/Z     | Difference Da      | Difference PPM     | Score |
|------------------|----------|------------------|--------------------|--------------------|-------|
| C42 H32 B2 F4 N8 | 747.2954 | 747.295361240274 | -0.481003983622941 | -0.646254938732369 | 99.47 |

Compound Spectra (Zoomed)

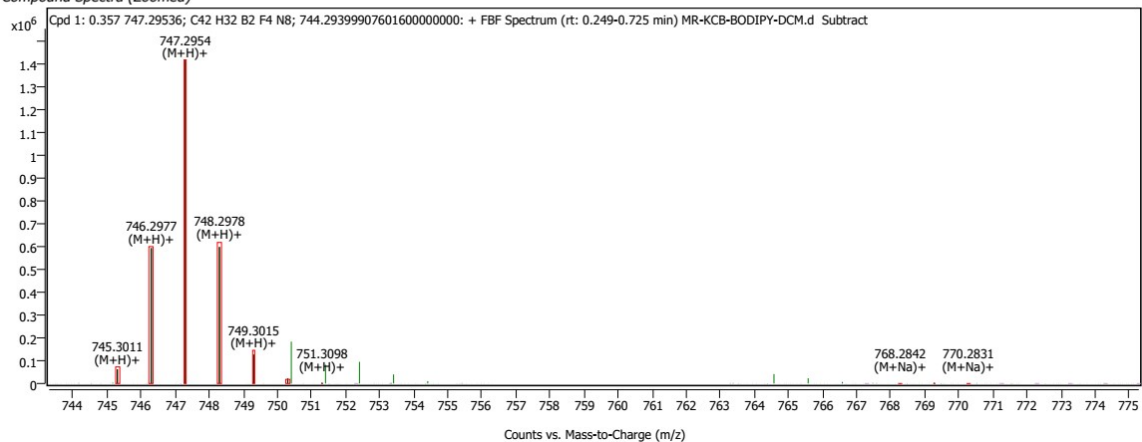

Fig. S1. High resolution mass spectrum of 10.

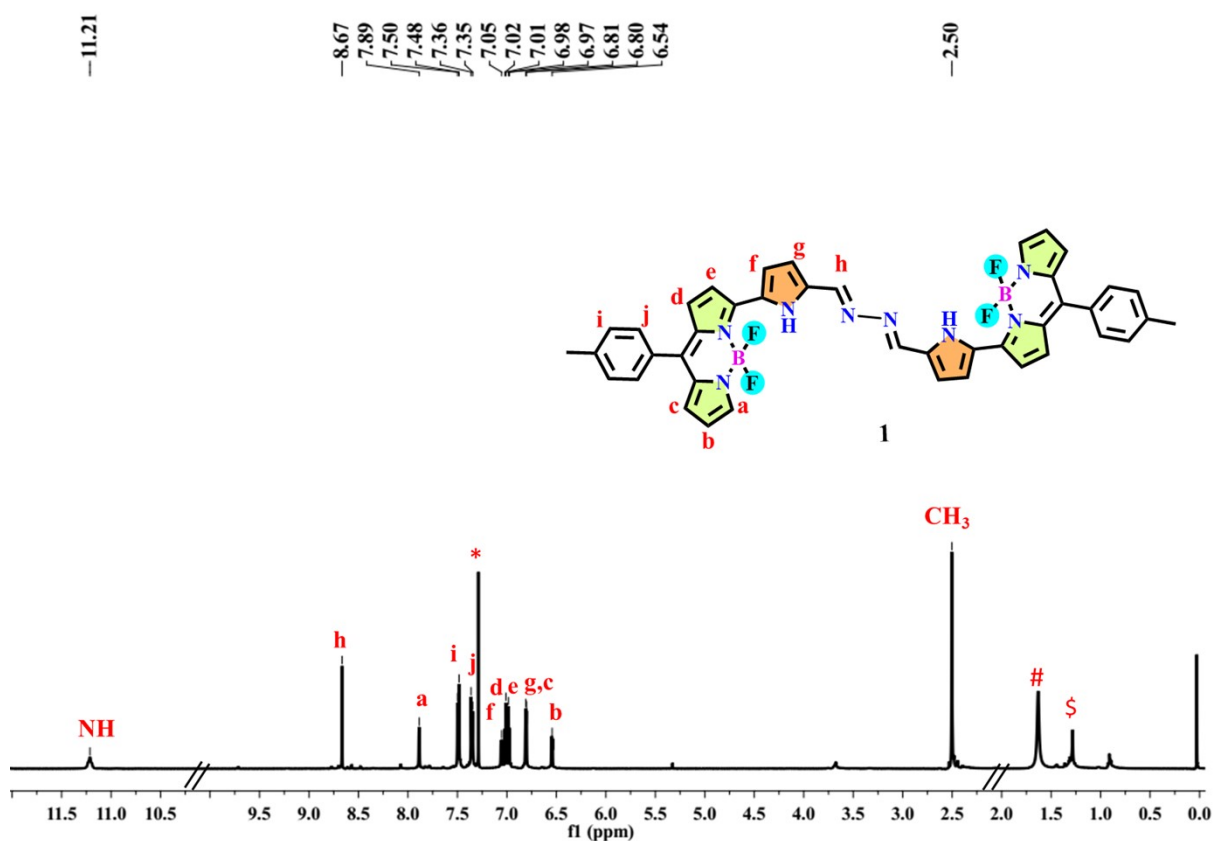

Fig. S2. <sup>1</sup>H NMR spectrum of 10 in CDCl<sub>3</sub> at room temperature. Note: Peaks marked with asterisk (\*, #, \$) are due to residual solvents.

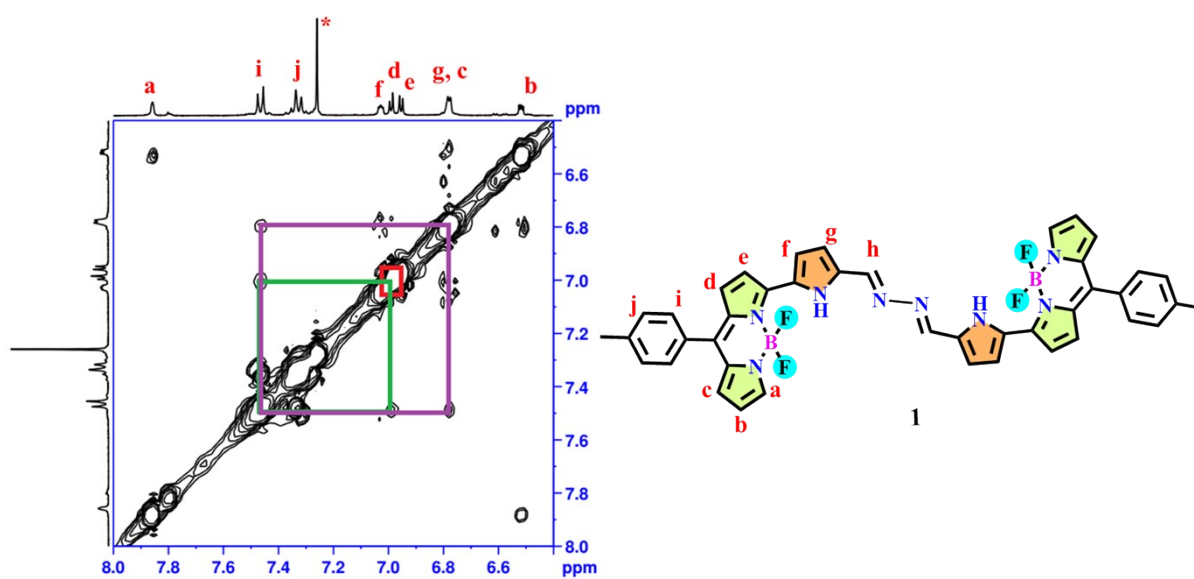

Fig. S3.  $^1\text{H}$ - $^1\text{H}$  COSY spectrum of compound **10** recorded in  $\text{CDCl}_3$  at RT.

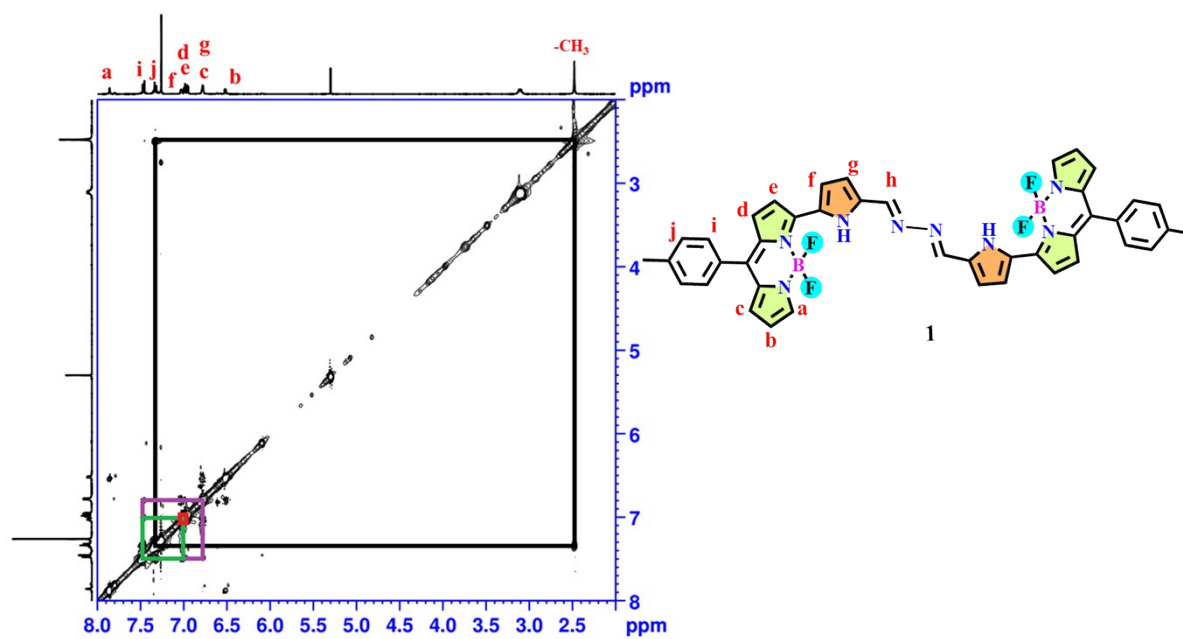

Fig. S4.  $^1\text{H}$ - $^1\text{H}$  NOESY spectrum of the compound **10** recorded in  $\text{CDCl}_3$ .

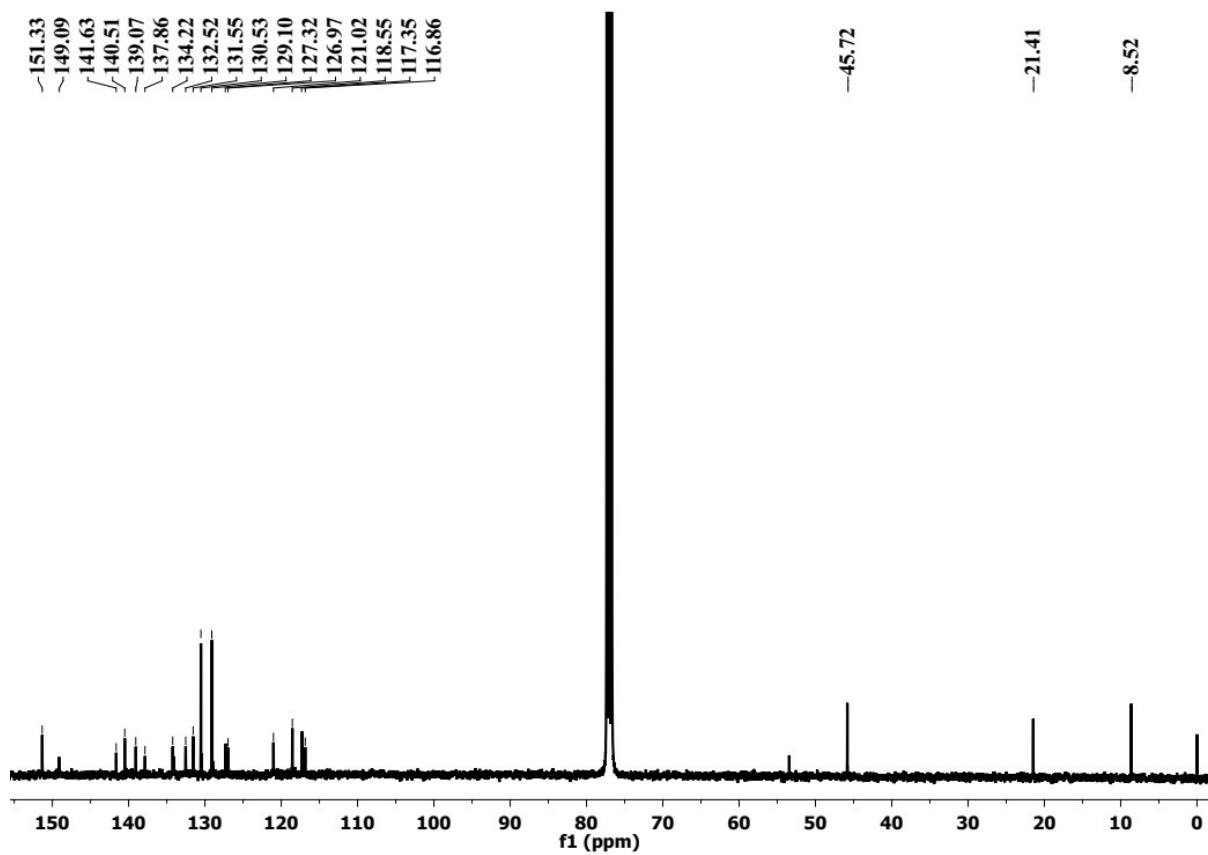

Fig. S5.  $^{13}\text{C}$  NMR spectrum of the compound **10** recorded in  $\text{CDCl}_3$ .

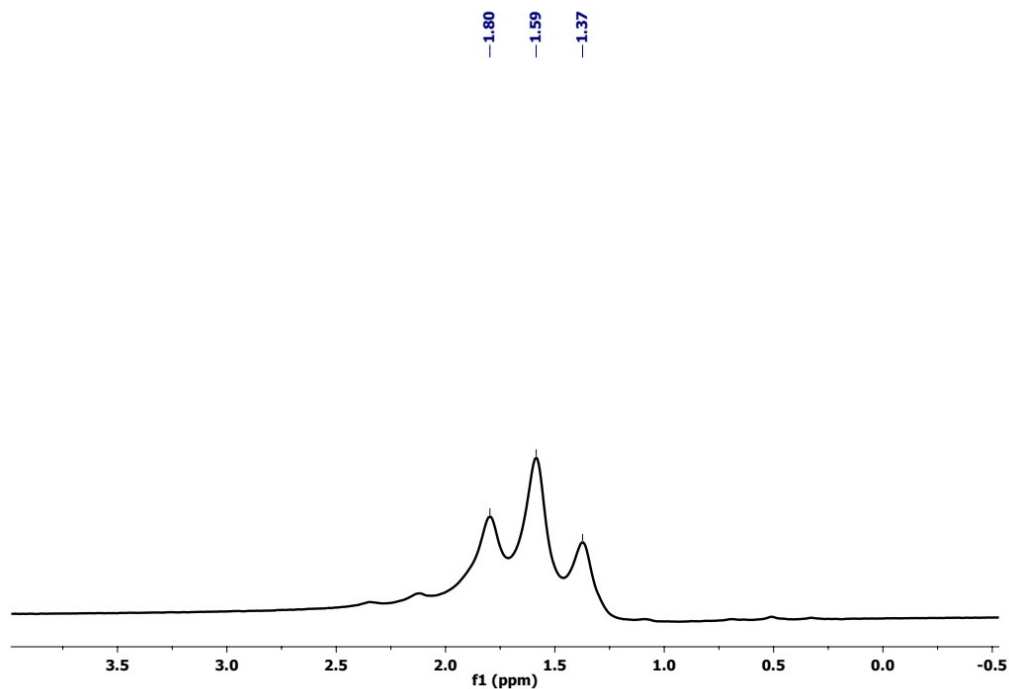

Fig. S6.  $^{11}\text{B}$  NMR spectrum of **10** in  $\text{CDCl}_3$  at room temperature.

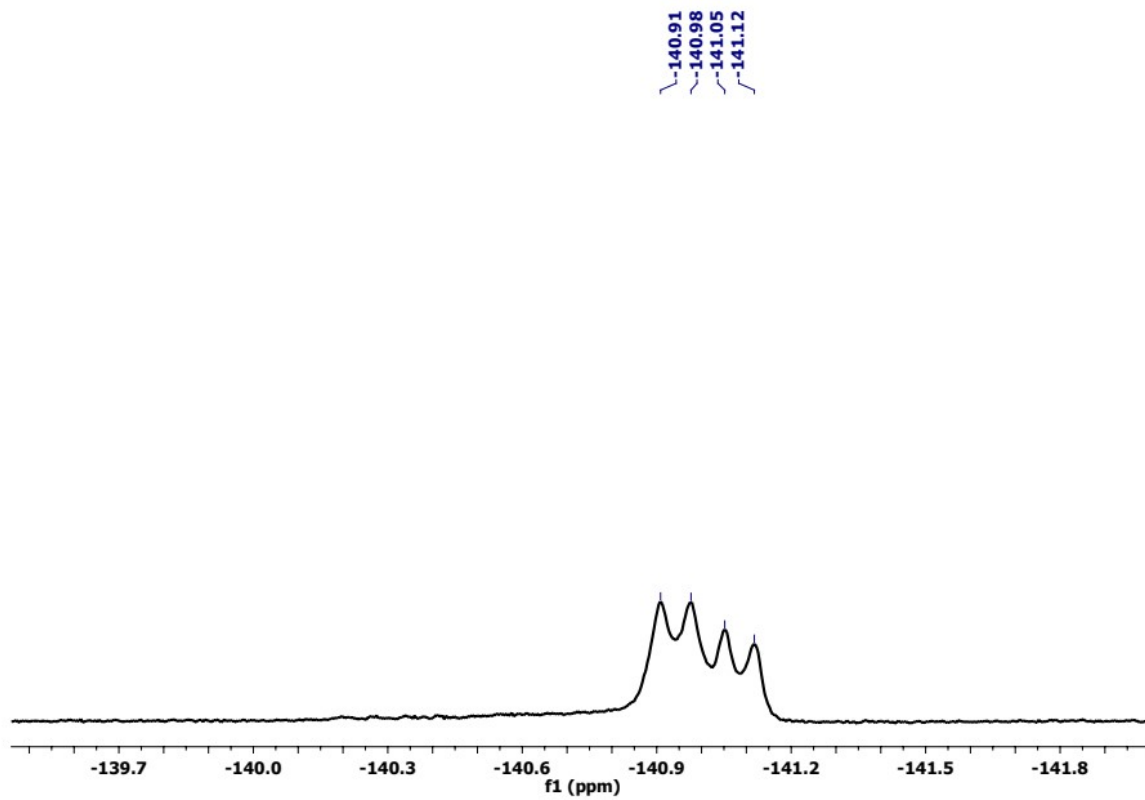

**Fig. S7.**  $^{19}\text{F}$  NMR spectrum of **10** in  $\text{CDCl}_3$  at room temperature.

**Table S1** Crystallographic parameters and structure refinement of structure of compound **10**.

|                                             |                                                                              |
|---------------------------------------------|------------------------------------------------------------------------------|
| Empirical formula                           | C <sub>42</sub> H <sub>32</sub> B <sub>2</sub> F <sub>4</sub> N <sub>8</sub> |
| Formula weight                              | 746.37                                                                       |
| Temperature/K                               | 294.00                                                                       |
| Crystal system                              | monoclinic                                                                   |
| Space group                                 | P21/c                                                                        |
| a/Å                                         | 11.505(3)                                                                    |
| b/Å                                         | 37.012(10)                                                                   |
| c/Å                                         | 9.556(2)                                                                     |
| α/°                                         | 90                                                                           |
| β/°                                         | 111.920(5)                                                                   |
| γ/°                                         | 90                                                                           |
| Volume/Å <sup>3</sup>                       | 3774.9(17)                                                                   |
| Z                                           | 4                                                                            |
| ρ <sub>calc</sub> /cm <sup>3</sup>          | 1.313                                                                        |
| μ/mm <sup>-1</sup>                          | 0.093                                                                        |
| F(000)                                      | 1544.0                                                                       |
| Crystal size/mm <sup>3</sup>                | 0.4 × 0.3 × 0.2                                                              |
| Radiation                                   | MoKα (λ = 0.71073)                                                           |
| 2θ range for data collection/°              | 3.816 to 49.998                                                              |
| Index ranges                                | -13 ≤ h ≤ 13, -44 ≤ k ≤ 44, -11 ≤ l ≤ 11                                     |
| Reflections collected                       | 70861                                                                        |
| Independent reflections                     | 6651 [R <sub>int</sub> = 0.1905, R <sub>sigma</sub> = 0.1049]                |
| Data/restraints/parameters                  | 6651/0/508                                                                   |
| Goodness-of-fit on F <sup>2</sup>           | 1.052                                                                        |
| Final R indexes [I ≥ 2σ(I)]                 | R <sub>1</sub> = 0.0974, wR <sub>2</sub> = 0.1954                            |
| Final R indexes [all data]                  | R <sub>1</sub> = 0.1607, wR <sub>2</sub> = 0.2130                            |
| Largest diff. peak/hole / e Å <sup>-3</sup> | 0.24/-0.24                                                                   |



**Table S2. Bond Lengths for 10.**

| Atom | Atom | Length/Å | Atom | Atom | Length/Å  |
|------|------|----------|------|------|-----------|
| F1   | B1   | 1.379(6) | C12  | C11  | 1.382(6)  |
| F2   | B1   | 1.397(6) | C13  | C12  | 1.376(6)  |
| F3   | B2   | 1.383(7) | C14  | C13  | 1.439(6)  |
| F4   | B2   | 1.403(7) | C15  | C16  | 1.423(7)  |
| N1   | C1   | 1.360(6) | C16  | C17  | 1.368(7)  |
| N1   | C4   | 1.389(5) | C17  | C18  | 1.371(8)  |
| N1   | B1   | 1.525(6) | C19  | C18  | 1.384(7)  |
| N2   | C6   | 1.393(5) | C20  | C19  | 1.416(7)  |
| N2   | C9   | 1.351(5) | C20  | C21  | 1.421(7)  |
| N2   | B1   | 1.550(6) | C22  | C21  | 1.357(7)  |
| N3   | C10  | 1.363(5) | C23  | C22  | 1.407(7)  |
| N3   | C13  | 1.362(5) | C23  | C24  | 1.387(7)  |
| N4   | N5   | 1.402(5) | C24  | C29  | 1.492(7)  |
| N4   | C14  | 1.280(6) | C25  | C24  | 1.399(7)  |
| N5   | C15  | 1.281(6) | C25  | C26  | 1.392(7)  |
| N6   | C16  | 1.361(6) | C27  | C26  | 1.373(8)  |
| N6   | C19  | 1.384(6) | C28  | C27  | 1.381(8)  |
| N7   | C20  | 1.361(6) | C29  | C30  | 1.374(9)  |
| N7   | C23  | 1.402(6) | C29  | C34  | 1.379(8)  |
| N7   | B2   | 1.548(7) | C30  | C31  | 1.405(9)  |
| N8   | C25  | 1.386(6) | C32  | C31  | 1.353(10) |
| N8   | C28  | 1.348(6) | C32  | C35  | 1.523(9)  |
| N8   | B2   | 1.516(7) | C33  | C32  | 1.389(10) |
| C1   | C2   | 1.366(7) | C34  | C33  | 1.385(8)  |
| C3   | C2   | 1.376(7) | C36  | C5   | 1.491(6)  |
| C4   | C3   | 1.400(6) | C36  | C37  | 1.373(6)  |
| C5   | C4   | 1.405(6) | C36  | C41  | 1.384(6)  |
| C6   | C5   | 1.390(6) | C37  | C38  | 1.389(7)  |
| C6   | C7   | 1.416(6) | C39  | C38  | 1.368(7)  |
| C7   | C8   | 1.356(6) | C39  | C40  | 1.365(7)  |
| C9   | C8   | 1.415(6) | C39  | C42  | 1.513(7)  |
| C10  | C9   | 1.440(6) | C41  | C40  | 1.388(7)  |
| C10  | C11  | 1.392(6) |      |      |           |

**Table S3. Bond Angles for 10**

| Atom | Atom | Atom | Angle/°  | Atom | Atom | Atom | Angle/°  |
|------|------|------|----------|------|------|------|----------|
| C1   | N1   | C4   | 107.7(4) | C18  | C19  | C20  | 126.9(5) |
| C1   | N1   | B1   | 126.2(4) | N7   | C20  | C19  | 128.0(4) |
| C4   | N1   | B1   | 125.9(4) | N7   | C20  | C21  | 108.8(4) |
| C6   | N2   | B1   | 122.9(3) | C19  | C20  | C21  | 123.2(5) |
| C9   | N2   | C6   | 107.3(3) | C22  | C21  | C20  | 107.9(5) |
| C9   | N2   | B1   | 129.8(4) | C21  | C22  | C23  | 107.8(5) |
| C13  | N3   | C10  | 109.9(4) | N7   | C23  | C22  | 108.3(5) |
| C14  | N4   | N5   | 111.5(4) | C24  | C23  | N7   | 121.3(4) |
| C15  | N5   | N4   | 111.5(4) | C24  | C23  | C22  | 130.3(5) |
| C16  | N6   | C19  | 110.1(4) | C23  | C24  | C25  | 120.7(5) |

|     |     |     |          |     |     |     |          |
|-----|-----|-----|----------|-----|-----|-----|----------|
| C20 | N7  | C23 | 107.2(4) | C23 | C24 | C29 | 120.4(5) |
| C20 | N7  | B2  | 128.9(4) | C25 | C24 | C29 | 118.9(5) |
| C23 | N7  | B2  | 123.8(4) | N8  | C25 | C24 | 120.3(5) |
| C25 | N8  | B2  | 126.0(4) | N8  | C25 | C26 | 107.6(4) |
| C28 | N8  | C25 | 107.5(4) | C26 | C25 | C24 | 132.0(5) |
| C28 | N8  | B2  | 126.4(4) | C27 | C26 | C25 | 107.9(5) |
| N1  | C1  | C2  | 109.4(5) | C26 | C27 | C28 | 107.1(5) |
| C1  | C2  | C3  | 108.2(5) | N8  | C28 | C27 | 109.9(5) |
| C2  | C3  | C4  | 107.4(4) | C30 | C29 | C24 | 120.8(5) |
| N1  | C4  | C3  | 107.4(4) | C30 | C29 | C34 | 119.4(5) |
| N1  | C4  | C5  | 119.7(4) | C34 | C29 | C24 | 119.8(5) |
| C3  | C4  | C5  | 132.9(4) | C29 | C30 | C31 | 119.1(7) |
| C4  | C5  | C36 | 119.6(4) | C32 | C31 | C30 | 122.8(8) |
| C6  | C5  | C4  | 120.4(4) | C31 | C32 | C33 | 116.3(7) |
| C6  | C5  | C36 | 119.9(4) | C31 | C32 | C35 | 123.1(8) |
| N2  | C6  | C7  | 108.0(4) | C33 | C32 | C35 | 120.5(7) |
| C5  | C6  | N2  | 122.2(4) | C34 | C33 | C32 | 122.6(7) |
| C5  | C6  | C7  | 129.6(4) | C29 | C34 | C33 | 119.3(6) |
| C8  | C7  | C6  | 107.8(4) | C37 | C36 | C5  | 120.8(4) |
| C7  | C8  | C9  | 107.3(4) | C37 | C36 | C41 | 118.3(4) |
| N2  | C9  | C8  | 109.6(4) | C41 | C36 | C5  | 120.8(4) |
| N2  | C9  | C10 | 128.0(4) | C36 | C37 | C38 | 120.2(5) |
| C8  | C9  | C10 | 122.4(4) | C39 | C38 | C37 | 121.7(5) |
| N3  | C10 | C9  | 126.9(4) | C38 | C39 | C42 | 120.3(5) |
| N3  | C10 | C11 | 106.9(4) | C40 | C39 | C38 | 118.0(5) |
| C11 | C10 | C9  | 126.2(4) | C40 | C39 | C42 | 121.8(5) |
| C12 | C11 | C10 | 107.6(4) | C39 | C40 | C41 | 121.3(5) |
| C13 | C12 | C11 | 108.2(4) | C36 | C41 | C40 | 120.4(5) |
| N3  | C13 | C12 | 107.4(4) | F1  | B1  | F2  | 106.9(4) |
| N3  | C13 | C14 | 122.6(4) | F1  | B1  | N1  | 110.6(4) |
| C12 | C13 | C14 | 130.0(4) | F1  | B1  | N2  | 111.2(4) |
| N4  | C14 | C13 | 121.2(4) | F2  | B1  | N1  | 111.7(4) |
| N5  | C15 | C16 | 122.0(5) | F2  | B1  | N2  | 108.8(4) |
| N6  | C16 | C15 | 122.8(5) | N1  | B1  | N2  | 107.7(4) |
| N6  | C16 | C17 | 106.5(5) | F3  | B2  | F4  | 106.9(4) |
| C17 | C16 | C15 | 130.7(5) | F3  | B2  | N7  | 110.5(5) |
| C16 | C17 | C18 | 109.5(5) | F3  | B2  | N8  | 111.5(5) |
| C17 | C18 | C19 | 107.8(5) | F4  | B2  | N7  | 109.4(4) |
| N6  | C19 | C20 | 127.0(5) | F4  | B2  | N8  | 110.7(5) |
| C18 | C19 | N6  | 106.2(4) | N8  | B2  | N7  | 107.9(4) |

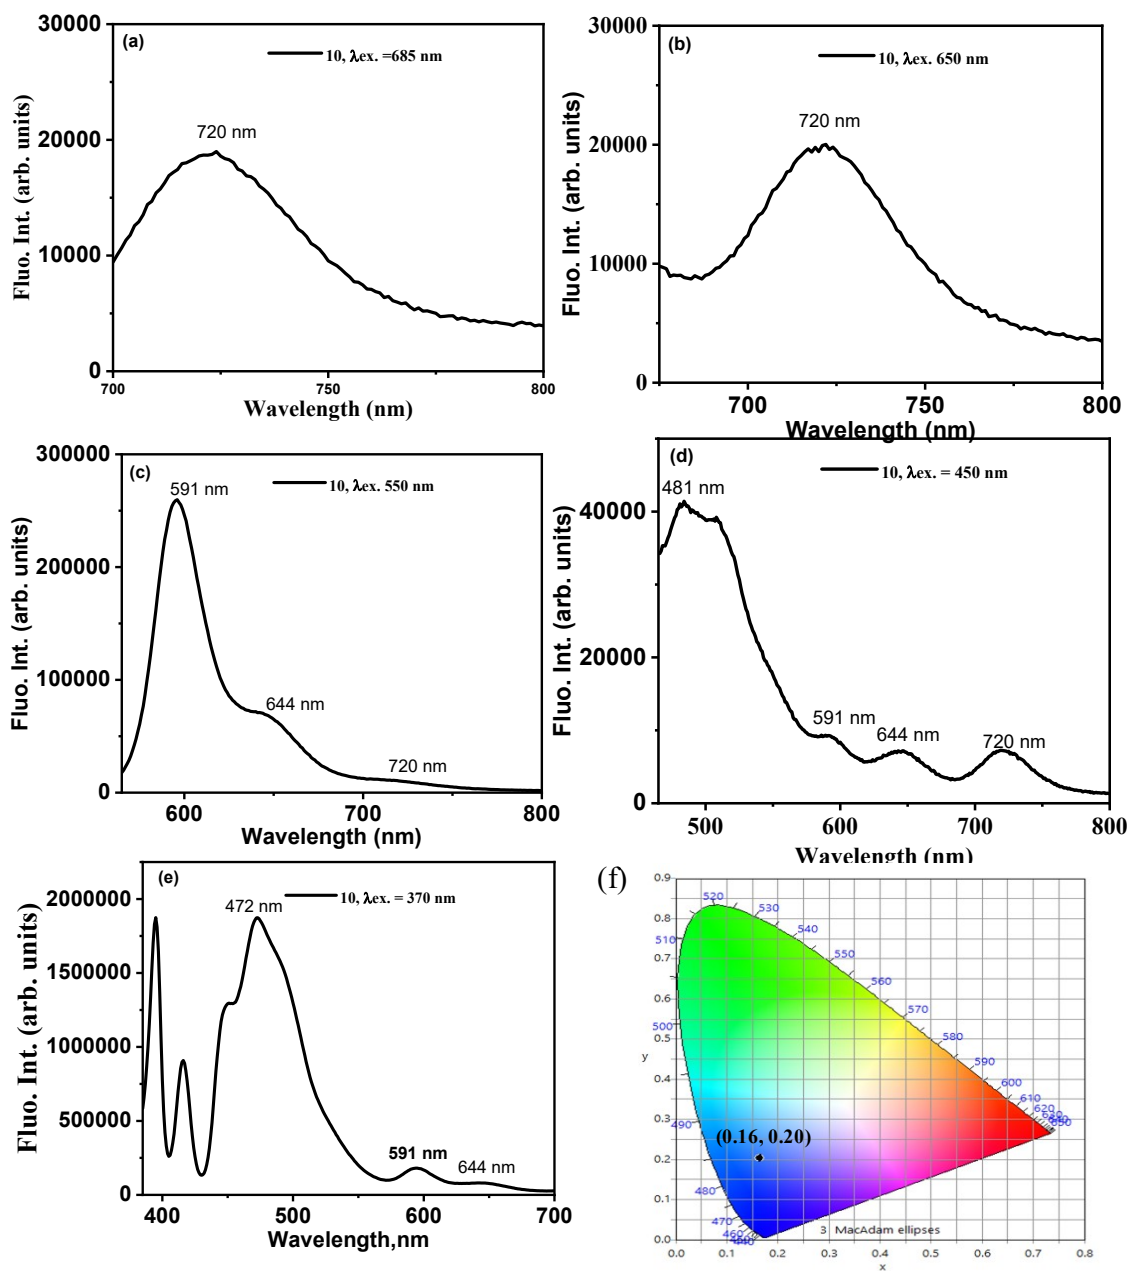

**Fig. S8.** (a-e) Emission profile of **10** at different excitation wavelengths and (f) CIE plot of **10** ( $\lambda_{\text{ex}} = 370 \text{ nm}$ ) in dichloromethane *conditions*,  $[10] = 1 \mu\text{M}$ .

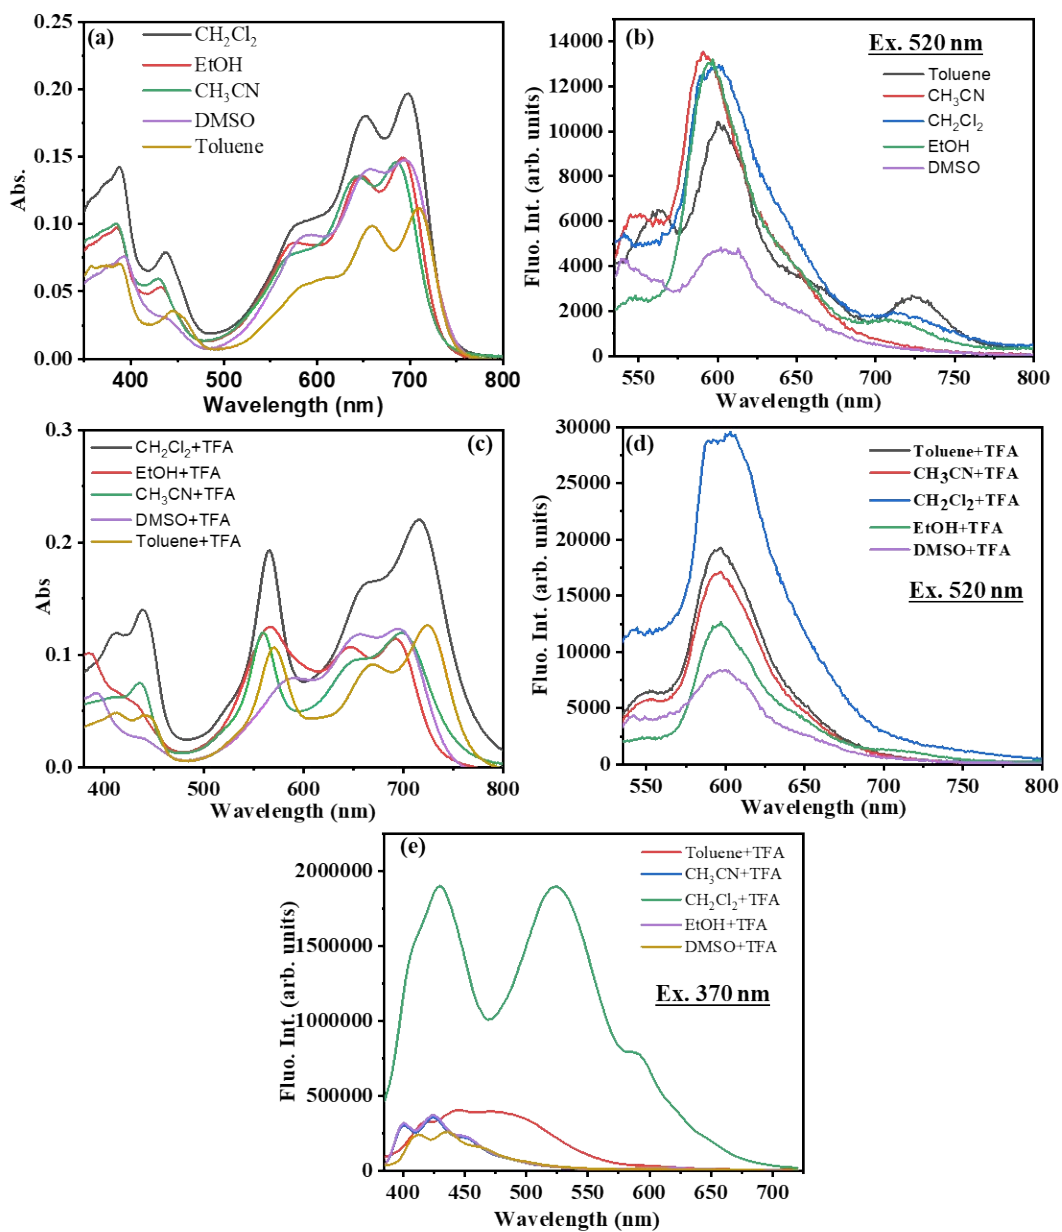

**Fig. S9.** (a) Absorption and (b) Emission profile of **10** at different solvents, (c) absorption, (d, e) emission profile of **10+TFA** at different solvents upon different excitation wavelengths conditions,  $[\mathbf{10}] = [\mathbf{10+TFA}] = 10\mu\text{M}$ . for abs. and  $1\mu\text{M}$ . for emission.

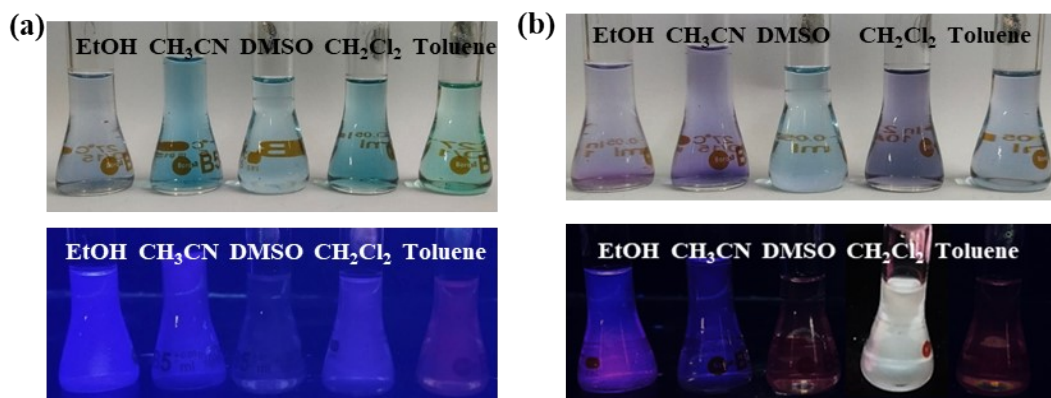

**Fig. S10.** Photographs depicting the change in colour of solution of (a) **10** and (b) **10+TFA** in visible (above) and UV light (below) in different solvents.

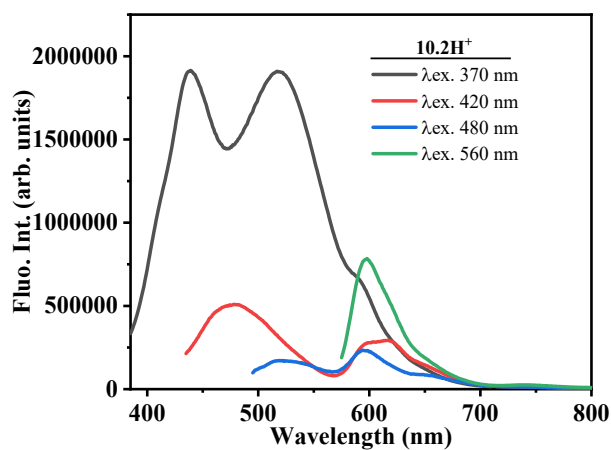

**Fig. S11.** Emission profile of **10.2H<sup>+</sup>** in CH<sub>2</sub>Cl<sub>2</sub> at different excitation wavelengths conditions, [**10.2H<sup>+</sup>**] = 1 μM.

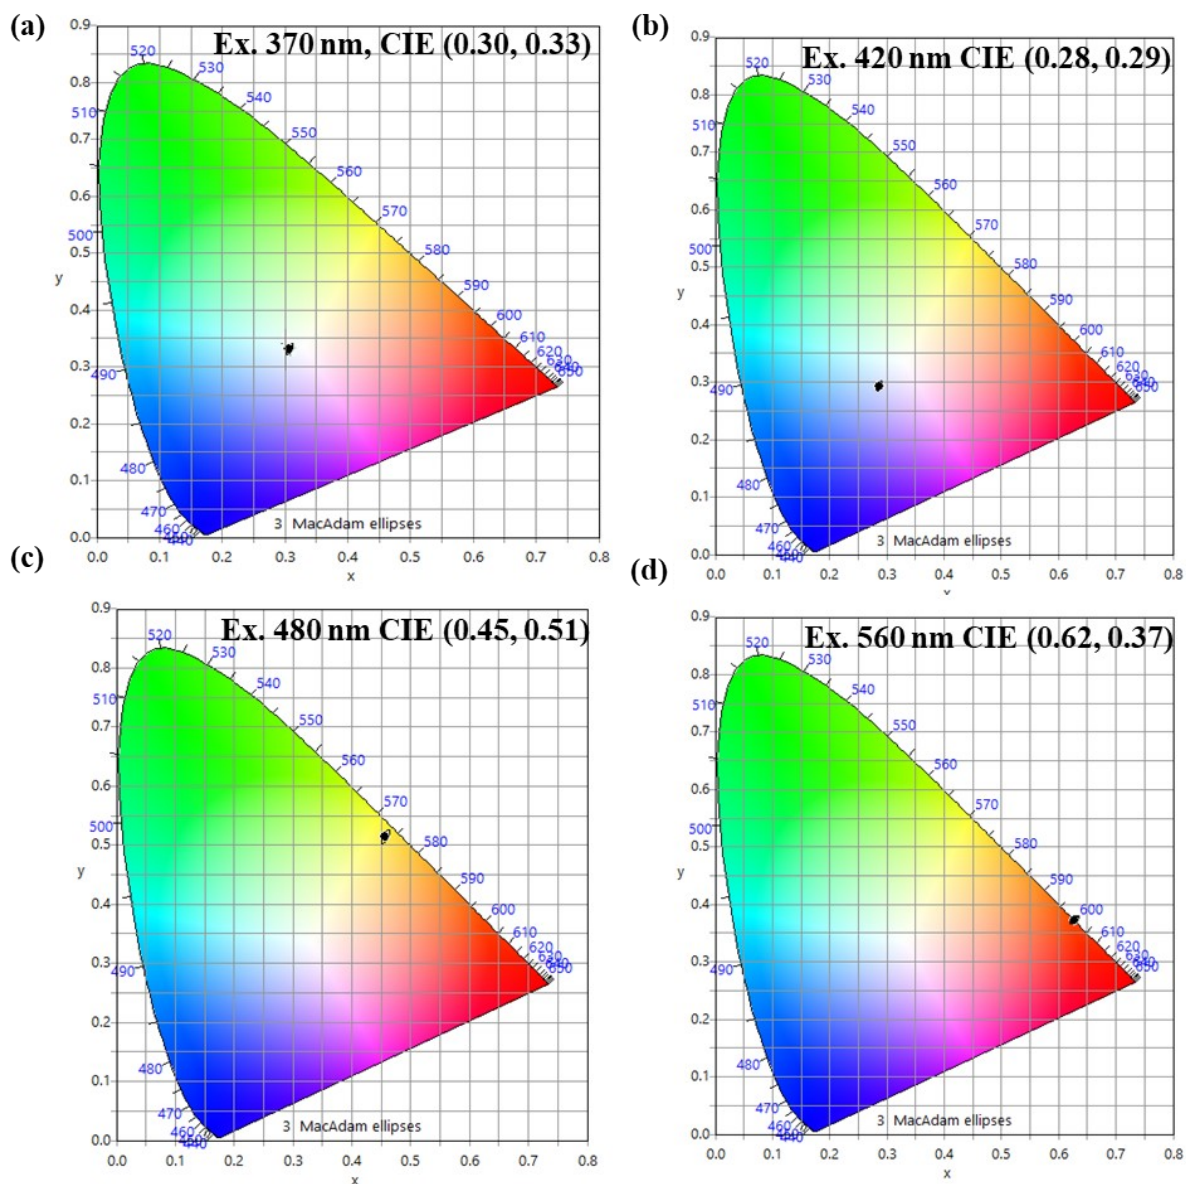

**Fig. S12.** (a-e) CIE plots of  $10.2\text{H}^+$  in dichloromethane at different excitation wavelengths. conditions,  $[10.2\text{H}^+] = 1\mu\text{M}$ .

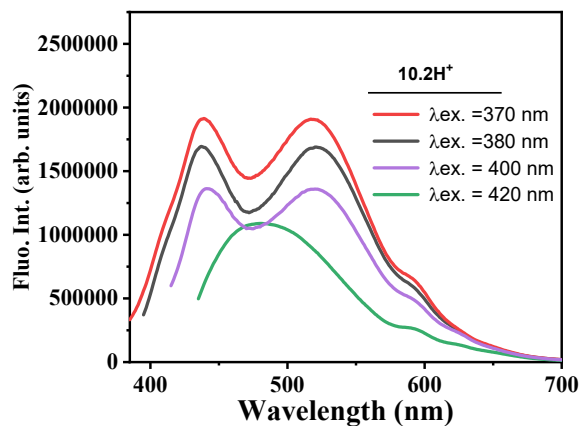

**Fig. S13.** Emission profile of **10** upon protonation ( $10.2H^+$ ) at different excitation wavelengths in dichloromethane; *conditions*,  $[10] = 1 \mu M$ .

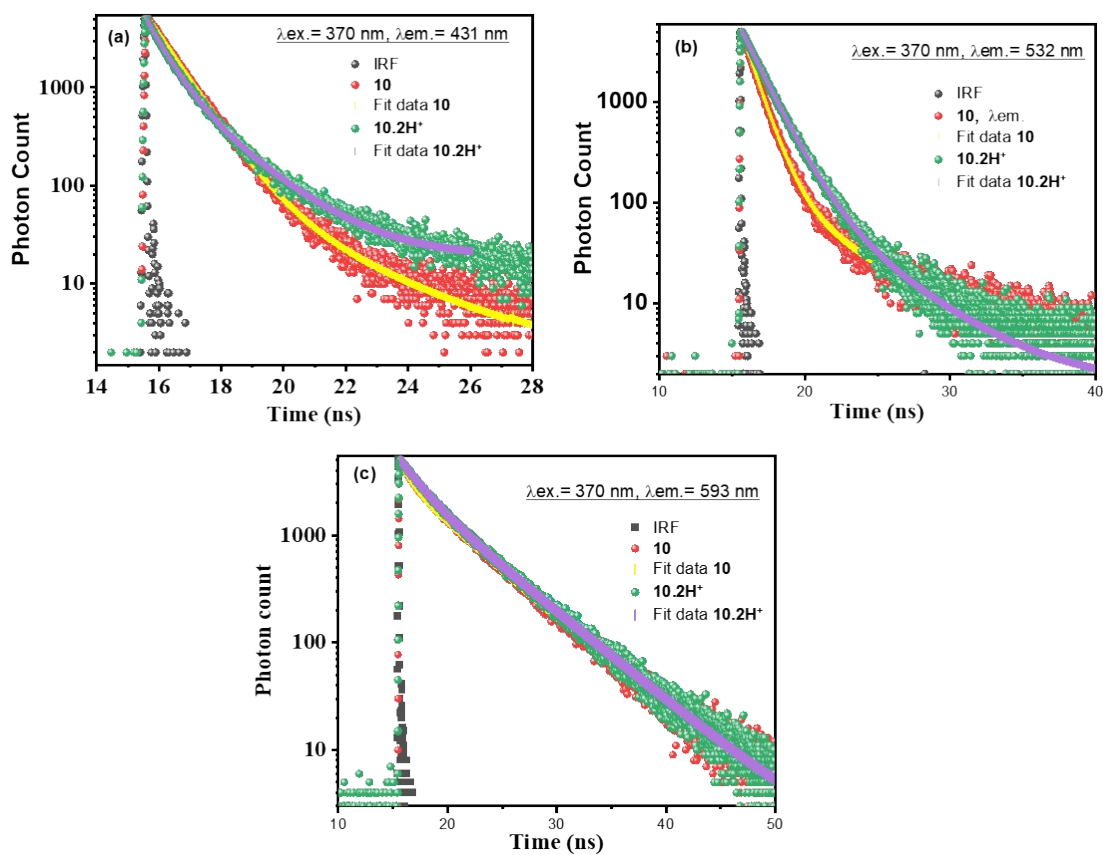

**Fig. S14.** (a-c) Emission decay profile (TCSPC data) of **10** alone and its protonation derivative  $10.2H^+$  at different emission wavelengths ( $\lambda_{ex.} = 370$  nm) in dichloromethane; *conditions*,  $[10] = 1 \mu M$ .

**Table S4:** Fit-results to the exponential decay curve of **10** and **10.2H<sup>+</sup>** obtained with time-correlated single photon counting technique with exponential fit equation  $A+B_1 \exp(-t/\tau_1) + B_2 \exp(-t/\tau_2)$ .

| <i>Parameter</i>               | <b>10</b> ( $\lambda_{\text{ex.}}=370 \text{ nm}$ ) |                 |                 | <b>10.2H<sup>+</sup></b> ( $\lambda_{\text{ex.}}=370 \text{ nm}$ ) |                 |                 |
|--------------------------------|-----------------------------------------------------|-----------------|-----------------|--------------------------------------------------------------------|-----------------|-----------------|
|                                | $\lambda_{\text{em.}} = 432$                        | <b>523</b>      | <b>594</b>      | $\lambda_{\text{em.}} = 432$                                       | <b>523</b>      | <b>594</b>      |
| $\tau_1, \text{ ns}$<br>(%)    | 0.88<br>(91.62)                                     | 0.94<br>(87.46) | 0.97<br>(9.62)  | 0.63<br>(55.94)                                                    | 1.42<br>(88.64) | 2.01<br>(21.94) |
| $\tau_2, \text{ ns}$<br>(%)    | 2.91<br>(8.38)                                      | 3.96<br>(12.54) | 4.76<br>(90.38) | 1.71<br>(44.06)                                                    | 4.17<br>(11.36) | 5.25<br>(78.06) |
| $\tau_{\text{av}}, \text{ ns}$ | <b>0.94</b>                                         | <b>1.04</b>     | <b>3.46</b>     | <b>0.87</b>                                                        | <b>1.53</b>     | <b>3.88</b>     |
| $\chi^2$                       | 1.13                                                | 1.18            | 1.02            | 1.04                                                               | 1.12            | 1.05            |

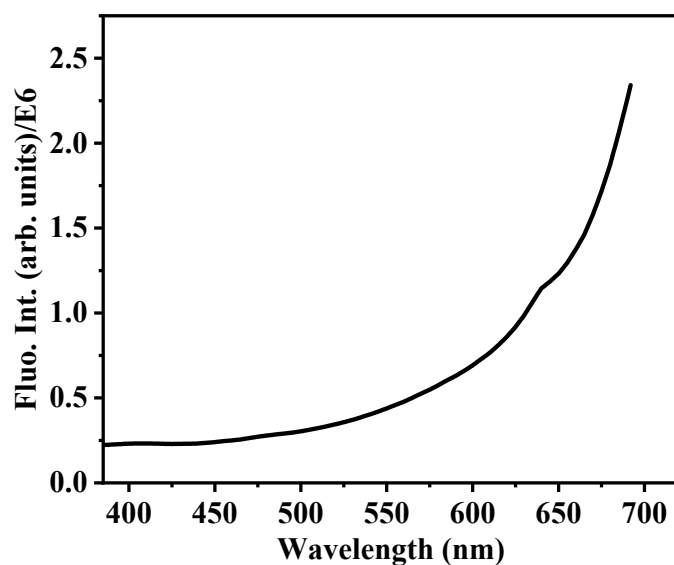

**Fig. S15.** Solid state fluorescence spectrum of compound **10**.



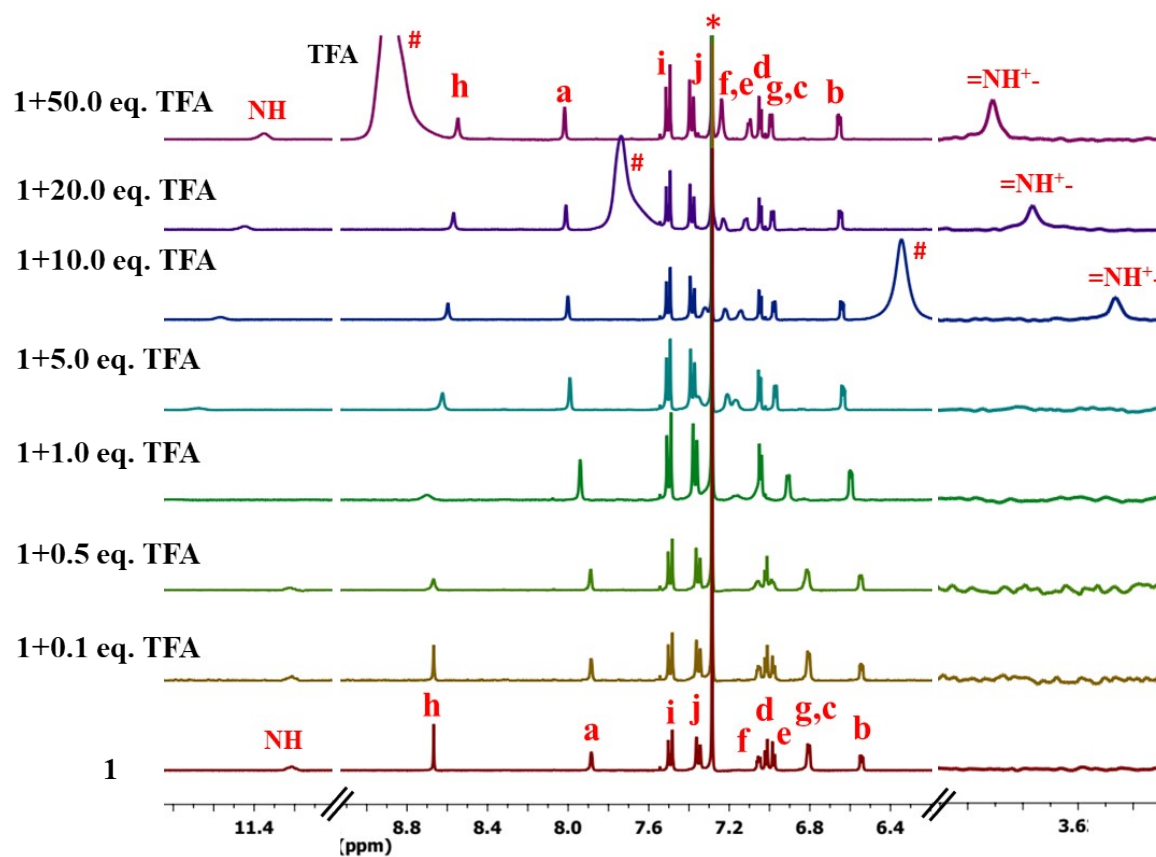

**Fig. S16.** Partial  $^1\text{H}$ -NMR titration of **10** (400 MHz) in the presence of TFA.

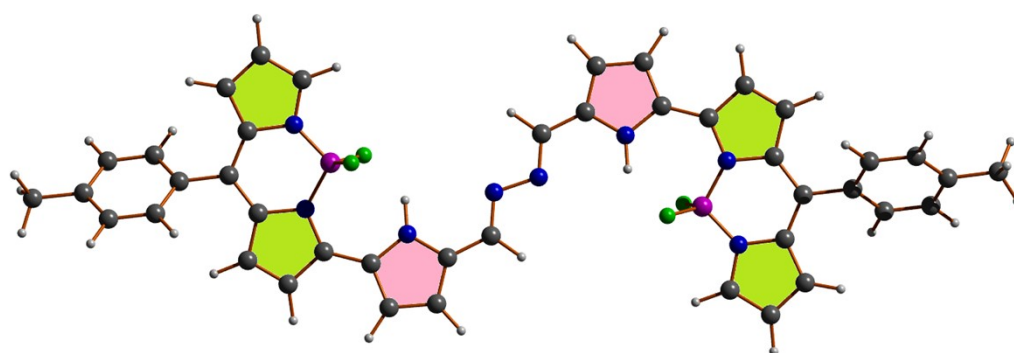

**10**

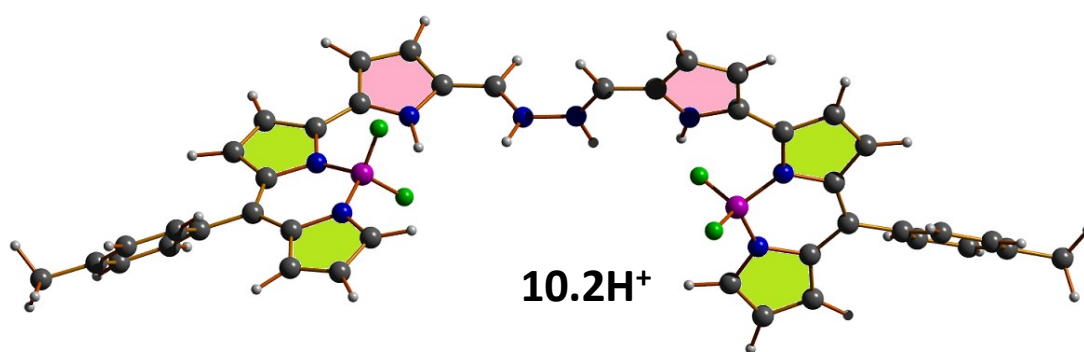

**10.2H<sup>+</sup>**

**Fig. S17.** DFT Optimized structure of **10** and **10.2H<sup>+</sup>**

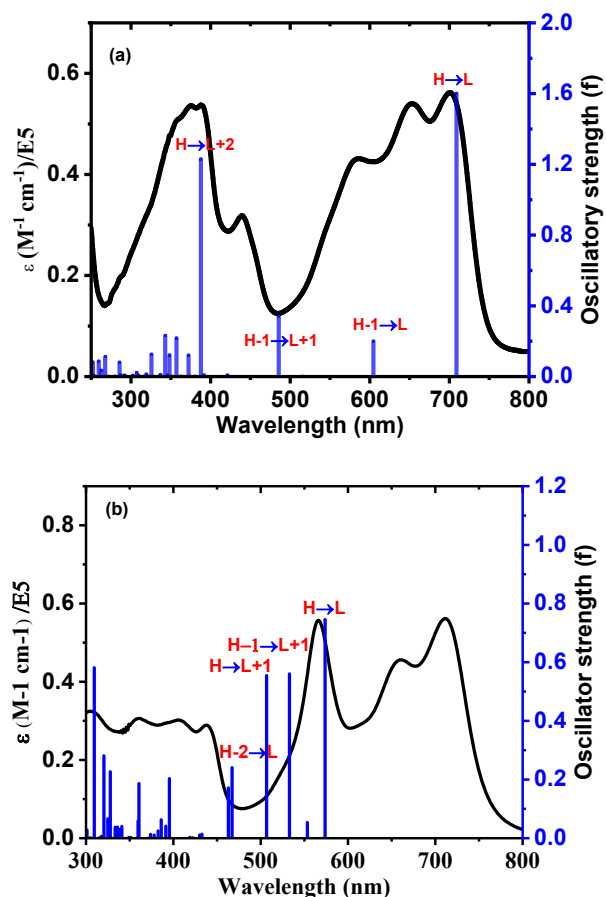

**Fig. S18.** Calculated excitation (blue vertical lines) and experimental UV/vis absorption spectra (black lines) for (a) **10** and (b) **10.2H<sup>+</sup>**.

**Table S5.**  $S_0$  optimized geometry of the compound **10** at B3LYP/6-31g (d,p)/LANL2DZ level of theory.

# Total Energy (hartree) = - 2506.660609

| Atom | X            | Y            | Z            | Atom | X             | Y            | Z            |
|------|--------------|--------------|--------------|------|---------------|--------------|--------------|
| C    | -9.870970000 | 0.102575000  | -0.077032000 | C    | -8.413196000  | 0.281875000  | 0.068111000  |
| C    | -7.558623000 | -0.827700000 | 0.055197000  | C    | -2.014511000  | -2.124643000 | 0.297680000  |
| C    | -7.875942000 | 1.577904000  | 0.222778000  | C    | -0.733962000  | -1.487189000 | 0.213992000  |
| H    | 0.156314000  | -2.106934000 | 0.348667000  | C    | -4.248495000  | -2.300237000 | 0.250973000  |
| C    | -5.635137000 | -1.952599000 | 0.143569000  | C    | -7.864108000  | -2.205652000 | -0.121775000 |
| H    | -8.853209000 | -2.600652000 | -0.298083000 | C    | -12.668779000 | -0.233178000 | -0.362469000 |
| C    | -3.722590000 | -3.588306000 | 0.469804000  | H    | -4.312230000  | -4.482831000 | 0.610221000  |

|   |               |              |              |   |               |              |              |
|---|---------------|--------------|--------------|---|---------------|--------------|--------------|
| C | -6.679141000  | -2.902179000 | -0.050900000 | H | -6.529255000  | -3.966320000 | -0.161313000 |
| C | -2.329615000  | -3.476193000 | 0.506193000  | H | -1.609086000  | -4.266379000 | 0.665628000  |
| C | -10.566568000 | -0.834888000 | 0.705679000  | H | -10.022977000 | -1.419608000 | 1.440073000  |
| C | -6.272755000  | 3.080045000  | 0.520925000  | H | -5.264037000  | 3.443505000  | 0.660051000  |
| C | -10.596904000 | 0.870859000  | -1.003782000 | H | -10.069741000 | 1.583515000  | -1.628952000 |
| C | 0.747997000   | 1.497044000  | -0.316262000 | H | -0.141627000  | 2.114964000  | -0.463135000 |
| C | -11.942608000 | -0.995265000 | 0.562959000  | H | -12.464268000 | -1.719608000 | 1.182932000  |
| C | -8.496630000  | 2.845639000  | 0.307096000  | H | -9.560587000  | 3.021654000  | 0.251804000  |
| C | 2.028947000   | 2.133402000  | -0.401767000 | C | 9.859320000   | -0.115394000 | 0.171625000  |
| C | 6.266002000   | -3.073827000 | -0.538414000 | H | 5.260402000   | -3.431570000 | -0.710701000 |
| C | 4.262688000   | 2.309881000  | -0.348967000 | N | 6.514080000   | -1.750716000 | -0.455904000 |
| N | 3.202519000   | 1.451031000  | -0.236671000 | H | 3.266581000   | 0.461300000  | -0.012591000 |
| N | 6.174164000   | 0.706871000  | -0.196217000 | B | -5.439141000  | 0.648761000  | 0.459711000  |
| B | 5.452715000   | -0.633316000 | -0.553182000 | C | 7.455277000   | -3.796106000 | -0.357897000 |
| H | 7.549624000   | -4.872963000 | -0.370543000 | C | 3.738031000   | 3.592900000  | -0.598594000 |
| H | 4.327838000   | 4.484902000  | -0.753293000 | C | 2.345304000   | 3.480354000  | -0.637325000 |
| H | 1.625547000   | 4.267214000  | -0.815587000 | C | 10.783292000  | -0.766884000 | -0.663981000 |
| H | 10.417105000  | -1.382843000 | -1.478222000 | C | 12.645704000  | 0.198332000  | 0.569520000  |
| C | 12.152200000  | -0.606478000 | -0.466746000 | H | 12.851719000  | -1.110659000 | -1.128259000 |
| C | 10.351340000  | 0.689816000  | 1.213874000  | H | 9.649789000   | 1.173167000  | 1.885411000  |
| C | 11.722041000  | 0.837600000  | 1.408380000  | H | 12.083725000  | 1.450072000  | 2.230115000  |
| C | 14.129195000  | 0.389370000  | 0.763204000  | H | 14.690516000  | -0.481101000 | 0.408521000  |
| H | 14.372480000  | 0.556504000  | 1.817568000  | H | 14.485726000  | 1.262790000  | 0.201183000  |
| F | 4.429519000   | -0.904186000 | 0.380055000  | F | -4.463156000  | 0.865634000  | -0.535448000 |
| F | -4.831958000  | 0.640122000  | 1.706160000  | F | 4.909029000   | -0.554920000 | -1.825973000 |
| N | -6.174673000  | -0.704794000 | 0.202300000  | N | -3.188997000  | -1.438783000 | 0.154312000  |
| H | -3.254035000  | -0.449169000 | -0.067702000 | N | -0.646610000  | -0.214266000 | -0.020308000 |
| N | -6.506508000  | 1.760931000  | 0.365373000  | N | 0.659784000   | 0.226683000  | -0.068770000 |
| C | -11.971169000 | 0.697483000  | -1.145180000 | H | -12.512424000 | 1.287689000  | -1.879930000 |
| C | 5.646496000   | 1.961771000  | -0.217089000 | C | 7.871465000   | -1.578811000 | -0.218125000 |
| C | 7.558659000   | 0.826859000  | -0.048001000 | C | -7.483258000  | 3.788530000  | 0.484215000  |
| H | -7.593149000  | 4.859247000  | 0.585009000  | C | 8.408946000   | -0.286495000 | -0.034736000 |
| C | -14.163068000 | -0.390719000 | -0.493745000 | H | -14.478038000 | -1.409079000 | -0.243884000 |
| H | -14.497566000 | -0.161528000 | -1.510744000 | H | -14.687829000 | 0.292524000  | 0.187128000  |
| C | 7.879430000   | 2.211048000  | 0.013415000  | H | 8.877925000   | 2.609067000  | 0.113827000  |
| C | 8.467828000   | -2.859038000 | -0.148122000 | H | 9.512196000   | -3.047751000 | 0.051589000  |
| C | 6.698905000   | 2.912132000  | -0.085732000 | H | 6.561270000   | 3.983273000  | -0.056671000 |

**Table S6.**  $S_0$  optimized geometry of the protonated derivative **10.2H<sup>+</sup>** at B3LYP/6-31g (d,p)/LANL2DZ level of theory.

# Total Energy (hartree) = -2507.444162

| Atom | X             | Y            | Z            | Atom | X             | Y            | Z            |
|------|---------------|--------------|--------------|------|---------------|--------------|--------------|
| C    | 9.523521000   | -1.096574000 | -0.185214000 | C    | 8.070489000   | -0.899879000 | -0.212720000 |
| C    | 7.478132000   | 0.196673000  | 0.490944000  | C    | 2.428848000   | 2.626607000  | 1.297711000  |
| C    | 7.250422000   | -1.769798000 | -0.928850000 | C    | 1.136783000   | 2.588483000  | 0.841252000  |
| H    | 0.393658000   | 3.236651000  | 1.291599000  | C    | 4.607620000   | 2.136715000  | 1.492164000  |
| C    | 5.882057000   | 1.537511000  | 1.249063000  | C    | 8.107976000   | 1.210533000  | 1.247692000  |
| H    | 9.172360000   | 1.315308000  | 1.386807000  | C    | 12.320958000  | -1.513450000 | -0.143667000 |
| C    | 4.294669000   | 3.124754000  | 2.479946000  | H    | 4.997473000   | 3.525007000  | 3.195164000  |
| C    | 7.108179000   | 2.033249000  | 1.740558000  | H    | 7.226278000   | 2.917265000  | 2.350373000  |
| C    | 2.959992000   | 3.422287000  | 2.362397000  | H    | 2.382103000   | 4.111305000  | 2.963023000  |
| C    | 10.239469000  | -1.049540000 | 1.028535000  | H    | 9.706051000   | -0.885047000 | 1.958344000  |
| C    | 5.337188000   | -2.582613000 | -1.692709000 | H    | 4.267678000   | -2.648244000 | -1.839362000 |
| C    | 10.229790000  | -1.352967000 | -1.375784000 | H    | 9.697336000   | -1.356977000 | -2.320653000 |
| C    | -1.159444000  | 2.471366000  | -1.485829000 | H    | -0.450730000  | 3.110820000  | -1.999645000 |
| C    | 11.611494000  | -1.264274000 | 1.043245000  | H    | 12.145942000  | -1.246124000 | 1.988700000  |
| C    | 7.549332000   | -2.957630000 | -1.659027000 | H    | 8.536170000   | -3.378831000 | -1.777499000 |
| C    | -2.471852000  | 2.463494000  | -1.884177000 | C    | -9.423973000  | -1.219289000 | 0.202641000  |
| C    | -5.495223000  | -1.221905000 | 2.767816000  | H    | -4.487875000  | -1.003317000 | 3.095097000  |
| C    | -4.657530000  | 1.967337000  | -1.921976000 | N    | -5.989852000  | -0.657815000 | 1.656422000  |
| N    | -3.478807000  | 1.681140000  | -1.331049000 | H    | -3.384128000  | 0.917388000  | -0.658976000 |
| N    | -6.128515000  | 0.492878000  | -0.549391000 | B    | 5.072390000   | -0.518174000 | -0.199268000 |
| B    | -5.235210000  | 0.298160000  | 0.718195000  | C    | -6.450703000  | -2.085739000 | 3.346485000  |
| H    | -6.308243000  | -2.673082000 | 4.242088000  | C    | -4.425574000  | 2.981235000  | -2.904922000 |
| H    | -5.189589000  | 3.426310000  | -3.524247000 | C    | -3.086674000  | 3.283018000  | -2.883124000 |
| H    | -2.567715000  | 4.019883000  | -3.480579000 | C    | -10.315994000 | -1.176670000 | 1.293150000  |
| H    | -9.982158000  | -0.761073000 | 2.237684000  | C    | -12.088965000 | -2.126124000 | -0.074731000 |
| C    | -11.626196000 | -1.616698000 | 1.148555000  | H    | -12.306801000 | -1.559652000 | 1.993035000  |

|   |               |              |              |   |               |              |              |
|---|---------------|--------------|--------------|---|---------------|--------------|--------------|
| C | -9.886879000  | -1.724784000 | -1.028662000 | H | -9.203588000  | -1.798699000 | -1.867580000 |
| C | -11.193905000 | -2.179610000 | -1.155066000 | H | -11.528465000 | -2.591252000 | -2.102795000 |
| C | -13.516801000 | -2.577175000 | -0.232062000 | H | -13.915074000 | -2.968571000 | 0.709062000  |
| H | -13.606296000 | -3.348751000 | -1.002638000 | H | -14.152193000 | -1.733946000 | -0.533213000 |
| F | -3.992966000  | -0.308482000 | 0.361910000  | F | 4.279556000   | 0.223164000  | -1.125443000 |
| F | 4.229283000   | -1.078041000 | 0.741844000  | F | -4.969053000  | 1.520067000  | 1.305859000  |
| N | 6.114979000   | 0.420323000  | 0.483279000  | N | 3.479353000   | 1.860231000  | 0.806116000  |
| H | 3.489034000   | 1.265712000  | -0.024299000 | N | 0.692807000   | 1.802348000  | -0.165961000 |
| N | 5.866968000   | -1.584077000 | -0.972042000 | N | -0.651103000  | 1.743581000  | -0.468192000 |
| C | 11.607091000  | -1.547434000 | -1.349879000 | H | 12.141268000  | -1.720388000 | -2.279305000 |
| C | -5.900190000  | 1.333793000  | -1.613129000 | C | -7.289084000  | -1.135079000 | 1.472002000  |
| C | -7.445604000  | 0.082109000  | -0.631809000 | C | 6.352860000   | -3.452804000 | -2.146953000 |
| H | 6.201384000   | -4.340758000 | -2.743569000 | C | -8.040774000  | -0.762514000 | 0.358488000  |
| C | 13.807934000  | -1.749081000 | -0.110071000 | H | 14.314152000  | -0.976610000 | 0.479470000  |
| H | 14.233860000  | -1.755747000 | -1.117216000 | H | 14.033367000  | -2.714248000 | 0.360702000  |
| C | -8.047737000  | 0.681020000  | -1.760811000 | H | -9.076695000  | 0.555429000  | -2.059301000 |
| C | -7.570167000  | -2.043676000 | 2.533689000  | H | -8.487453000  | -2.602394000 | 2.642587000  |
| C | -7.079906000  | 1.459375000  | -2.375576000 | H | -7.184736000  | 2.045595000  | -3.277185000 |
| H | 1.280503000   | 1.096019000  | -0.595974000 | H | -1.224714000  | 1.134941000  | 0.106371000  |

**Table S7.** Major transitions were calculated using TD-DFT studies of **10**.

| Energy (cm <sup>-1</sup> ) | Wavelength (nm) | Osc. Strength | Major contribs                                                    |
|----------------------------|-----------------|---------------|-------------------------------------------------------------------|
| 14105.8304088              | 708.926714004   | 1.5999        | HOMO->LUMO (99%)                                                  |
| 16540.8182299              | 604.565013713   | 0.0001        | H-1->LUMO (12%), HOMO->L+1 (87%)                                  |
| 19383.9225922              | 515.891453469   | 0.0005        | H-1->LUMO (88%), HOMO->L+1 (13%)                                  |
| 20596.1738989              | 485.527071633   | 0.3423        | H-1->L+1 (92%)                                                    |
| 23735.2837366              | 421.313691084   | 0.008         | H-4->LUMO (34%), H-2->LUMO (40%), HOMO->L+2 (21%)                 |
| 23785.2901112              | 420.42791798    | 0.003         | H-4->LUMO (57%), H-2->LUMO (23%), HOMO->L+2 (12%)                 |
| 25520.188688               | 391.846632572   | 0.0085        | H-3->LUMO (58%), H-2->L+1 (29%)                                   |
| 25783.9319863              | 387.838441605   | 1.2301        | H-5->LUMO (20%), H-3->L+1 (12%), H-2->LUMO (18%), HOMO->L+2 (37%) |
| 26296.0940487              | 380.28461495    | 0.0002        | H-3->LUMO (28%), H-2->L+1 (57%)                                   |

|               |               |        |                                                                                   |
|---------------|---------------|--------|-----------------------------------------------------------------------------------|
| 26767.1218352 | 373.592650774 | 0.0002 | H-4->L+1 (98%)                                                                    |
| 26860.682149  | 372.291364178 | 0.1207 | H-7->LUMO (14%), H-6->L+1 (11%), H-5->LUMO (44%), H-3->L+1 (12%), HOMO->L+2 (12%) |
| 27614.0039857 | 362.135096569 | 0.0002 | H-7->L+1 (17%), H-6->LUMO (66%)                                                   |
| 27995.5042306 | 357.200210349 | 0.2177 | H-7->LUMO (31%), H-6->L+1 (11%), H-3->L+1 (36%), H-2->LUMO (11%)                  |
| 28489.9220956 | 351.001310795 | 0.0003 | H-8->LUMO (20%), H-5->L+1 (19%), H-1->L+2 (43%)                                   |
| 28709.3049003 | 348.319126316 | 0.1214 | H-9->LUMO (24%), H-8->L+1 (13%), H-7->LUMO (16%), H-5->LUMO (15%), H-3->L+1 (24%) |
| 28902.8779632 | 345.986306718 | 0.0074 | H-12->LUMO (14%), H-9->L+1 (24%), H-8->LUMO (38%)                                 |
| 29160.9753805 | 342.924057564 | 0.2309 | H-9->LUMO (43%), H-5->LUMO (13%), H-3->L+1 (11%)                                  |
| 29662.6522353 | 337.124270637 | 0.0095 | H-11->LUMO (43%), H-10->LUMO (29%), H-10->L+1 (11%)                               |
| 29690.8816403 | 336.803740661 | 0.0033 | H-12->LUMO (14%), H-11->LUMO (30%), H-11->L+1 (13%), H-10->LUMO (31%)             |
| 29870.743278  | 334.775733798 | 0.0003 | H-5->L+1 (41%), H-1->L+2 (24%)                                                    |
| 30555.5079882 | 327.273236755 | 0.0006 | H-12->LUMO (31%), H-8->LUMO (11%), H-5->L+1 (17%)                                 |
| 30709.5598842 | 325.631498391 | 0.1256 | H-14->LUMO (21%), H-14->L+1 (15%), H-13->LUMO (42%)                               |
| 31074.9290405 | 321.802826548 | 0.0003 | H-14->LUMO (30%), H-13->LUMO (12%), HOMO->L+3 (11%)                               |
| 31328.9936856 | 319.193144227 | 0.0134 | H-7->LUMO (21%), H-6->L+1 (69%)                                                   |
| 31658.0678927 | 315.875246522 | 0.0    | H-7->L+1 (68%), H-6->LUMO (13%)                                                   |
| 32279.114803  | 309.797838665 | 0.005  | H-11->L+1 (10%), H-10->L+1 (65%)                                                  |
| 32302.5048814 | 309.573515636 | 0.0025 | H-11->L+1 (59%), H-10->L+1 (10%), H-9->L+1 (10%)                                  |
| 32413.0028382 | 308.518160132 | 0.0007 | H-4->L+2 (89%)                                                                    |
| 32535.5991114 | 307.355643452 | 0.0212 | H-12->L+1 (13%), H-8->L+1 (67%)                                                   |
| 32944.5222069 | 303.540598865 | 0.0005 | H-12->LUMO (12%), H-11->L+1 (10%), H-9->L+1 (59%), H-8->LUMO (14%)                |
| 33074.37747   | 302.348850226 | 0.0057 | H-12->L+1 (60%), H-9->LUMO (17%)                                                  |
| 34210.8126605 | 292.305245691 | 0.0029 | H-13->LUMO (16%), H-13->L+1 (43%), HOMO->L+3 (24%)                                |
| 34247.9141642 | 291.988585117 | 0.0073 | H-14->L+1 (36%), H-13->LUMO (10%), H-13->L+1 (13%), HOMO->L+3 (17%)               |
| 34297.1139844 | 291.569722297 | 0.0021 | H-14->LUMO (13%), H-14->L+1 (32%), H-13->L+1 (14%), HOMO->L+3 (25%)               |
| 34756.8500089 | 287.713069436 | 0.0017 | H-2->L+2 (10%), HOMO->L+4 (78%)                                                   |
| 34797.1777303 | 287.379628241 | 0.0033 | H-2->L+2 (14%), HOMO->L+5 (67%)                                                   |
| 34837.5054518 | 287.046959026 | 0.0087 | H-2->L+2 (42%), HOMO->L+5 (24%), HOMO->L+6 (16%)                                  |
| 35022.206416  | 285.53312379  | 0.0802 | H-2->L+2 (19%), HOMO->L+6 (68%)                                                   |
| 35752.1381743 | 279.703550911 | 0.0007 | HOMO->L+7 (76%)                                                                   |
| 37072.4677746 | 269.741956775 | 0.0001 | H-3->L+2 (90%)                                                                    |
| 37383.7977841 | 267.495562054 | 0.1116 | H-15->LUMO (26%), H-1->L+3 (65%)                                                  |
| 38066.9493855 | 262.695071747 | 0.0347 | H-15->LUMO (40%), H-1->L+3 (21%), HOMO->L+8 (29%)                                 |
| 38529.9116278 | 259.538617597 | 0.0864 | H-5->L+2 (80%), HOMO->L+8 (12%)                                                   |
| 39356.6299175 | 254.086796074 | 0.0024 | H-1->L+5 (88%)                                                                    |

|               |               |        |                                                                    |
|---------------|---------------|--------|--------------------------------------------------------------------|
| 39373.5675605 | 253.977493521 | 0.0017 | H-1->L+4 (89%)                                                     |
| 39484.0655173 | 253.266725931 | 0.0003 | H-15->L+1 (14%), H-1->L+6 (66%)                                    |
| 39634.8911955 | 252.302950718 | 0.007  | H-15->L+1 (43%), H-1->L+6 (20%)                                    |
| 39671.9926992 | 252.066995369 | 0.0814 | H-15->LUMO (11%), H-11->L+2 (14%), H-7->L+2 (12%), HOMO->L+8 (23%) |
| 39842.9822382 | 250.985228471 | 0.0007 | H-6->L+2 (88%)                                                     |
| 40016.3914404 | 249.897595461 | 0.0745 | H-7->L+2 (24%), H-1->L+7 (65%)                                     |

**Table S8.** Major and minor transitions were calculated using TD-DFT studies of **10.2H<sup>+</sup>**.

| Energy (cm-1) | Wavelength (nm) | Osc. Strength | Major contribs                                                     |
|---------------|-----------------|---------------|--------------------------------------------------------------------|
| 17428.0281018 | 573.788379361   | 0.7455        | HOMO->LUMO (98%)                                                   |
| 18068.4323185 | 553.451446354   | 0.0537        | H-1->LUMO (58%), HOMO->L+1 (41%)                                   |
| 18762.0691274 | 532.990254545   | 0.5601        | H-1->L+1 (97%)                                                     |
| 19730.7409966 | 506.823337335   | 0.5545        | H-1->LUMO (41%), HOMO->L+1 (57%)                                   |
| 21400.3086647 | 467.282979732   | 0.2405        | H-3->LUMO (25%), H-3->L+1 (13%), H-2->LUMO (48%), H-2->L+1 (10%)   |
| 21598.7210542 | 462.990376833   | 0.1712        | H-3->LUMO (42%), H-3->L+1 (16%), H-2->LUMO (20%), H-2->L+1 (19%)   |
| 23108.5909453 | 432.739496046   | 0.0137        | H-3->LUMO (22%), H-3->L+1 (33%), H-2->LUMO (15%), H-2->L+1 (29%)   |
| 23252.9641881 | 430.05269862    | 0.0107        | H-3->LUMO (10%), H-3->L+1 (35%), H-2->LUMO (14%), H-2->L+1 (40%)   |
| 23692.5363519 | 422.073848552   | 0.0015        | H-4->LUMO (66%), H-4->L+1 (31%)                                    |
| 23869.1717718 | 418.95043932    | 0.003         | H-5->LUMO (50%), H-5->L+1 (48%)                                    |
| 25283.8682403 | 395.509101098   | 0.2031        | H-7->LUMO (18%), H-7->L+1 (16%), H-6->LUMO (17%), HOMO->L+2 (33%)  |
| 25554.063974  | 391.327188121   | 0.0411        | H-7->LUMO (32%), H-6->LUMO (14%), H-6->L+1 (27%)                   |
| 25898.4627152 | 386.123304305   | 0.0629        | H-6->LUMO (18%), HOMO->L+2 (51%)                                   |
| 26134.7831629 | 382.63183351    | 0.0246        | H-1->L+2 (66%)                                                     |
| 26453.3721623 | 378.023638674   | 0.0108        | HOMO->L+3 (72%)                                                    |
| 26741.3120935 | 373.953228811   | 0.0132        | H-1->L+3 (69%)                                                     |
| 26807.4495567 | 373.030637579   | 0.0004        | H-5->LUMO (49%), H-5->L+1 (50%)                                    |
| 26893.7508806 | 371.833592287   | 0.0001        | H-4->LUMO (32%), H-4->L+1 (66%)                                    |
| 27732.5674867 | 360.586880561   | 0.1861        | H-10->LUMO (13%), H-9->LUMO (28%), H-9->L+1 (19%), H-8->LUMO (13%) |
| 27813.2229296 | 359.541216252   | 0.0582        | H-10->L+1 (12%), H-9->LUMO (16%), H-8->LUMO (20%), H-8->L+1 (23%)  |
| 28481.8565513 | 351.100707989   | 0.0026        | H-6->LUMO (43%), H-6->L+1 (51%)                                    |
| 28661.7181889 | 348.897436437   | 0.0026        | H-7->LUMO (28%), H-7->L+1 (66%)                                    |
| 29325.512484  | 341.000008285   | 0.0405        | H-3->L+2 (25%), H-3->L+3 (12%), H-2->L+2 (51%)                     |
| 29539.2494077 | 338.532637102   | 0.0298        | H-3->L+2 (43%), H-3->L+3 (15%), H-2->L+2 (20%), H-2->L+3 (18%)     |
| 29774.763301  | 335.85489493    | 0.038         | H-10->LUMO (12%), H-8->LUMO (42%), H-8->L+1 (29%)                  |
| 29998.9854322 | 333.34460669    | 0.0374        | H-9->LUMO (28%), H-9->L+1 (35%), H-8->L+1 (16%)                    |
| 30503.8885048 | 327.827057145   | 0.2268        | H-10->LUMO (53%), H-9->L+1 (17%)                                   |
| 30777.3104562 | 324.91468071    | 0.0661        | H-11->LUMO (38%), H-10->L+1 (36%)                                  |
| 31203.9777492 | 320.471962914   | 0.281         | H-12->LUMO (10%), H-11->L+1 (66%)                                  |
| 31436.2654247 | 318.103943484   | 0.0007        | H-13->LUMO (29%), H-12->LUMO (15%), H-12-                          |



|               |               |        |                                                                                                  |
|---------------|---------------|--------|--------------------------------------------------------------------------------------------------|
| 31468.5276019 | 317.777816824 | 0.0065 | >L+1 (13%), H-10->L+1 (19%)<br>H-3->L+2 (20%), H-3->L+3 (29%), H-2->L+2 (12%),<br>H-2->L+3 (32%) |
| 31650.0023484 | 315.955742749 | 0.0023 | H-3->L+3 (38%), H-2->L+2 (13%), H-2->L+3 (38%)                                                   |
| 32313.7966435 | 309.46533799  | 0.5813 | H-13->LUMO (26%), H-12->LUMO (33%), H-11-><br>L+1 (14%)                                          |
| 32606.5759012 | 306.686603043 | 0.0003 | H-4->L+2 (74%), H-4->L+3 (22%)                                                                   |
| 32854.1881109 | 304.375197654 | 0.0015 | H-5->L+2 (60%), H-5->L+3 (36%)                                                                   |
| 33209.0720596 | 301.122536096 | 0.0275 | H-13->LUMO (19%), H-12->LUMO (17%), H-11-><br>LUMO (13%), H-10->L+1 (13%)                        |
| 33651.0638867 | 297.167424889 | 0.0267 | H-12->LUMO (21%), H-12->L+1 (70%)                                                                |
| 33858.348375  | 295.34813362  | 0.003  | H-13->LUMO (15%), H-13->L+1 (70%)                                                                |
| 34038.2100127 | 293.787481665 | 0.0659 | H-7->L+2 (29%), H-7->L+3 (17%), H-6->L+2 (21%)                                                   |
| 34239.0420655 | 292.064245865 | 0.0148 | H-7->L+2 (14%), H-6->L+2 (25%), H-6->L+3 (25%)                                                   |
| 35176.258312  | 284.28265199  | 0.0001 | H-5->L+2 (38%), H-5->L+3 (62%)                                                                   |
| 35294.821813  | 283.327680558 | 0.0001 | H-4->L+2 (23%), H-4->L+3 (77%)                                                                   |
| 35881.9934374 | 278.691316787 | 0.0178 | H-9->L+2 (33%), H-9->L+3 (19%), H-8->L+2 (22%),<br>H-7->L+2 (10%)                                |
| 35966.6816524 | 278.035101949 | 0.0173 | H-9->L+2 (21%), H-8->L+2 (25%), H-8->L+3 (24%),<br>H-6->L+2 (11%)                                |
| 36834.534218  | 271.48436141  | 0.0007 | H-6->L+2 (33%), H-6->L+3 (60%)                                                                   |
| 37040.2055974 | 269.976903171 | 0.0006 | H-7->L+2 (20%), H-7->L+3 (72%)                                                                   |
| 37100.6971796 | 269.536713868 | 0.1109 | H-15->L+1 (10%), H-14->LUMO (23%), H-11->L+3<br>(11%), H-10->L+2 (39%)                           |
| 37343.4700627 | 267.784434152 | 0.0076 | H-15->LUMO (34%), H-14->L+1 (18%), H-11->L+2<br>(20%), H-10->L+3 (13%)                           |
| 37970.9694085 | 263.359091321 | 0.0032 | H-14->LUMO (30%), H-10->L+2 (13%), H-8->L+2<br>(25%), H-8->L+3 (12%)                             |
| 38190.3522131 | 261.846236562 | 0.0025 | H-11->L+2 (16%), H-9->L+2 (21%), H-8->L+3 (28%)                                                  |

## References

- S1. M. Fischer and J. Georges, *Chem. Phys. Lett.*, 1996, **260**, 115.
- S2. S. Uchiyama, Y. Matsumura, A. P. de Silva and K. Iwai, *Anal. Chem.*, 2003, **75**, 5926.
- S3. S5. J. R. Lakowicz, *Principles of Fluorescence Spectroscopy*, 3<sup>rd</sup> edn., Springer Science, 2006, pp. 141-143.
- S4. M. J. Frisch, G. W. Trucks, H. B. Schlegel, G. E. Scuseria, M. A. Robb, J. R. Cheeseman, G. Scalmani, V. Barone, B. Mennucci, G. A. Petersson, *et al.* Gaussian 09 C.01; Gaussian Inc.: Wallingford CT, 2009.

S5. F. Furche, R. J. Ahlrichs, *R. J. Chem. Phys.* 2002, **117**, 7433–7447.
